# Supplementary material for: Picocyanobacteria containing a novel pigment gene cluster dominate the brackish water Baltic Sea
Source: PubMed Central journal article supplement (PMC4139726; doi:10.1038/ismej.2014.35), 2014-03-13

# cpcBA-IGS %GC

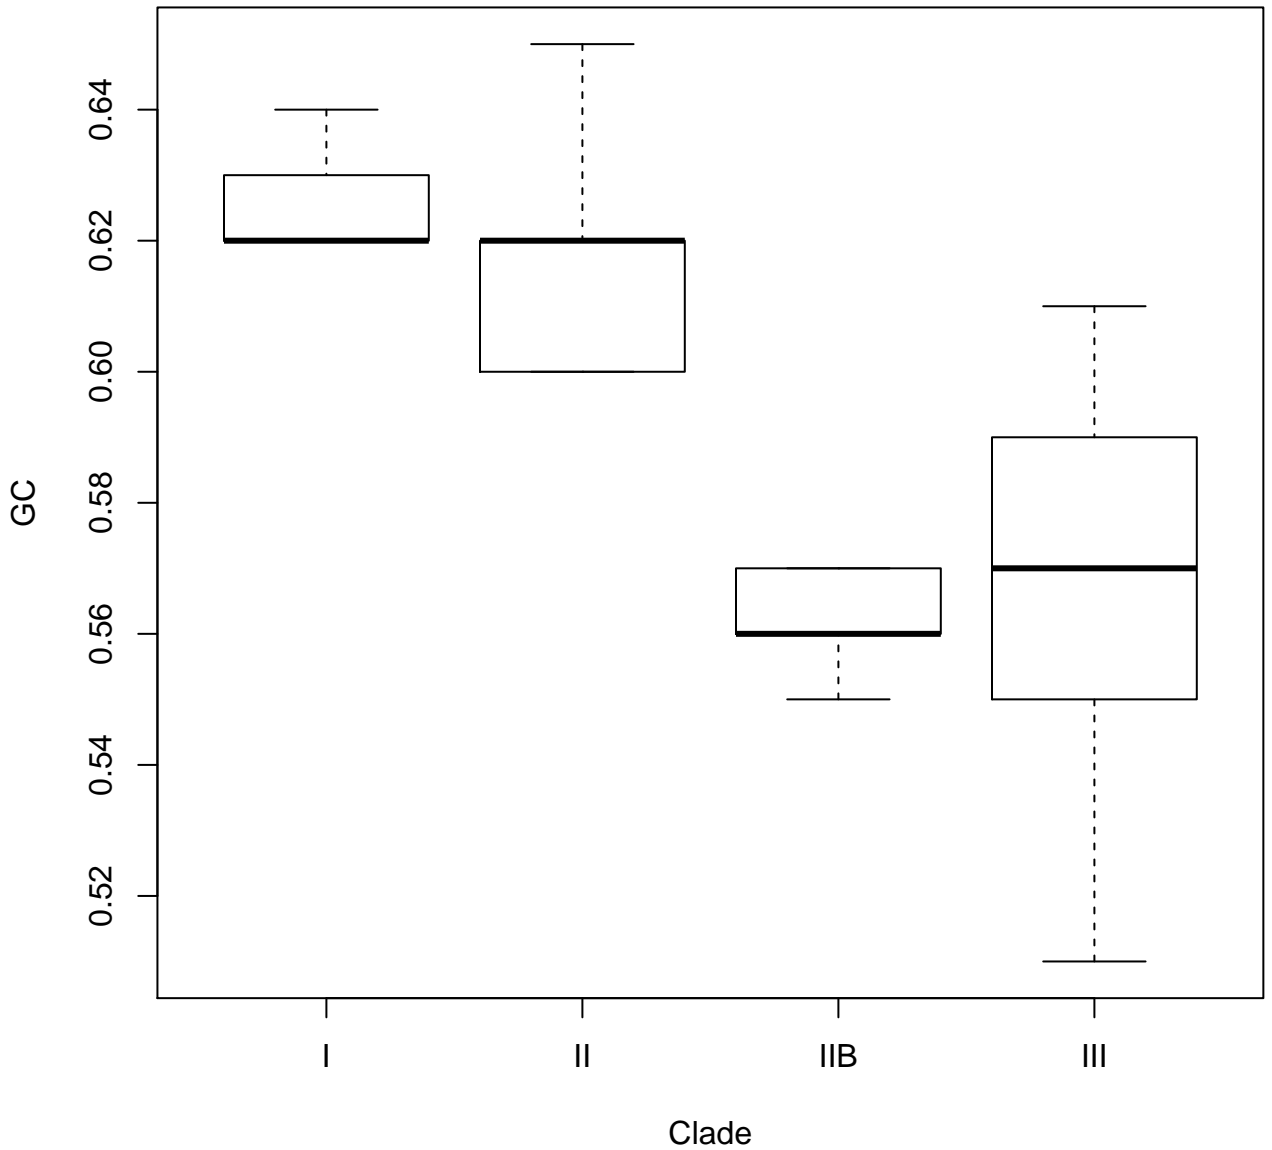

Supplement: ismej201435x1.pdf [file ismej201435x1.pdf]
