# Supplementary material for: Picocyanobacteria containing a novel pigment gene cluster dominate the brackish water Baltic Sea
Source: PubMed Central journal article supplement (PMC4139726; doi:10.1038/ismej.2014.35), 2014-03-13
Supplement: ismej201435x3.pdf [file ismej201435x3.pdf]

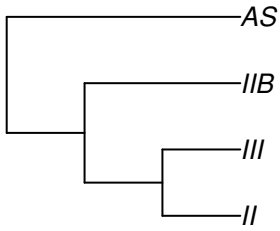

ML best tree  
 $p = 0.821$

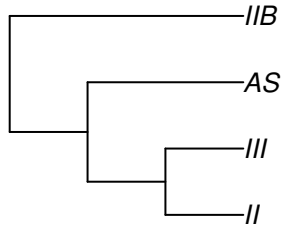

$p = 0.484$

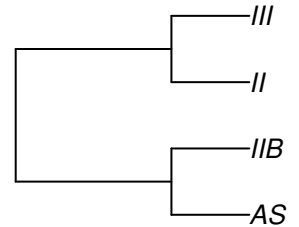

$p = 0.409$

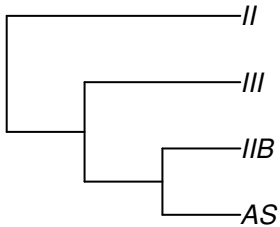

$p = 0.243$

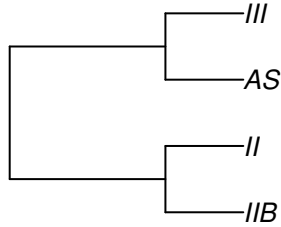

$p = 0.130$

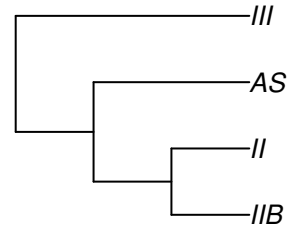

$p = 0.129$

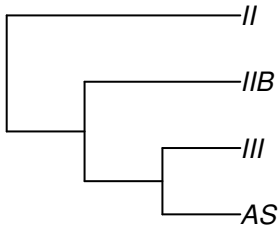

$p = 0.058$

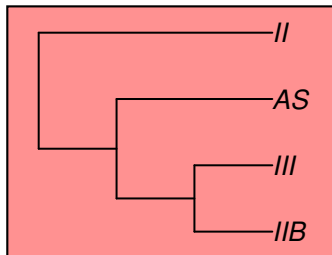

$p = 0.020$

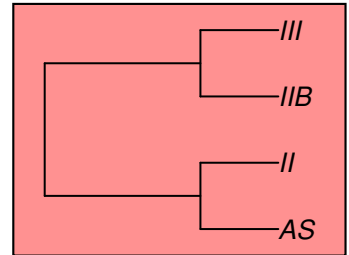

$p = 0.012$
